# Supplementary material
Source: Springer Nature journal article supplement (https://www.springermedizin.de/resource/supplementary/12885_2008_1400_MOESM8_ESM.pdf/9473032)
Supplement: MOESM8 [file 9473032]

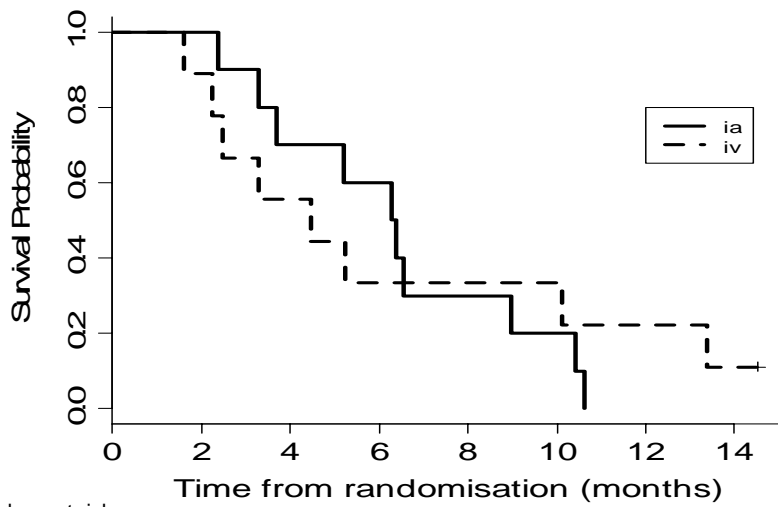

Log-Rank Test  
p=0.79

| Numbers at risk |    | Time from randomisation (months) |   |   |   |    |                |
|-----------------|----|----------------------------------|---|---|---|----|----------------|
| (months)        |    | 0                                | 3 | 6 | 9 | 12 | median (95%CI) |
| i.a.            | 10 | 9                                | 6 | 2 | 0 |    | 6.3 (3.7-9)    |
| i.v.            | 9  | 6                                | 3 | 3 | 2 |    | 4.5 (2.5-10.1) |

Key: i.a. = intra-arterial; i.v. = intravenous
